# Supplementary material
Source: Springer Nature journal article supplement (https://www.springermedizin.de/resource/supplementary/13012_2010_456_MOESM4_ESM.pdf/9629724)
Supplement: MOESM4 [file 9629724]

## Enabling factors

- National institutional will
- CHMT's support
- Existence of committees & boards
- Presence of REACT focal person
- Collaboration with researchers

## Mechanism of change

Publicity

## Constraining factors

- Inactive structures
- Limited resources
- Low level of public awareness
- Interference from higher authorities
